# Supplementary material for: Rose bengal as photocatalyst: visible light-mediated Friedel–Crafts alkylation of indoles with nitroalkenes in water
Source: Royal Society of Chemistry journal article supplement (doi:10.1039/c9ra09227g), 2020-01-01

## *Supplementary Information*

### **Rose Bengal used as photocatalyst: visible light-mediated Friedel–Crafts alkylation of indoles with nitroalkenes in water**

Zong-Yi Yu , Jing-Nan Zhao, Fan Yang, Xiao-Fei Tang, Yu-Feng Wu, Cun-Fei Ma, Bo Song, Lei Yun Qing-Wei Meng \*

*State Key Laboratory of Fine Chemicals, School of School of Chemical Engineering, Dalian University of Technology, Dalian 116024 China*

mengqw@dlut.edu.cn

## **Table of Contents**

|                                                    |          |
|----------------------------------------------------|----------|
| <b>1. Screen of light source.....</b>              | <b>3</b> |
| <b>2. Cyclic voltammetry (CV) experiments.....</b> | <b>3</b> |
| <b>3. Graphical Supporting Information.....</b>    | <b>4</b> |
| <b>4. NMR spectra.....</b>                         | <b>6</b> |

**Table S1. Screen of light source**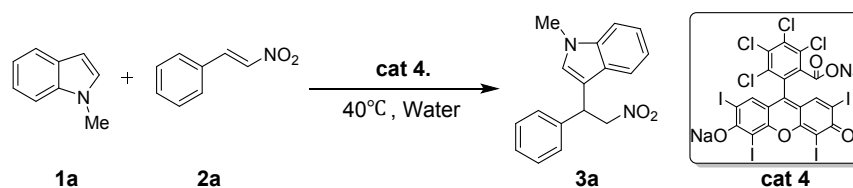

| Entry    | Light source     | Yield <sup>b</sup> (%) |
|----------|------------------|------------------------|
| <b>1</b> | <b>White LED</b> | <b>64.98</b>           |
| 2        | Red LED          | 55.96                  |
| 3        | Green LED        | 19.13                  |
| 4        | Blue LED         | 46.31                  |
| 5        | Purple LED       | 40.06                  |

<sup>a</sup> N-methyl indole **1a** (39.4 mg, 0.3 mmol), (*E*)-2-nitroethenylbenzene **2a** (67.1 mg, 0.45 mmol) and catalyst were added to a test tube equipped with a stirring bar and dissolved in Water (3 mL) under the exposure of LED lamps.  
<sup>b</sup> Isolated yields.

### Cyclic voltammetry (CV) experiments

Cyclic voltammetry (CV) experiments were performed in a CH Instruments Electrochemical Analyzer, a platinum mesh counter electrode, a glassy carbon working electrode, and a Ag/AgNO<sub>3</sub> (0.01M) reference electrode were used. Samples were prepared with a substrate concentration of 1 M in a 0.1 M tetraethylammonium hexafluorophosphate in acetonitrile electrolyte solution. From the result,  $E_{1/2\text{ox}}(\mathbf{4}) = -1.211$  V vs SCE (Figure S1) is higher than  $E_{1/2\text{red}}(\mathbf{1a}) = -1.977$  V vs SCE (Figure S2) so the photoredox reaction between Rose Bengal and **1a** could occur spontaneously.

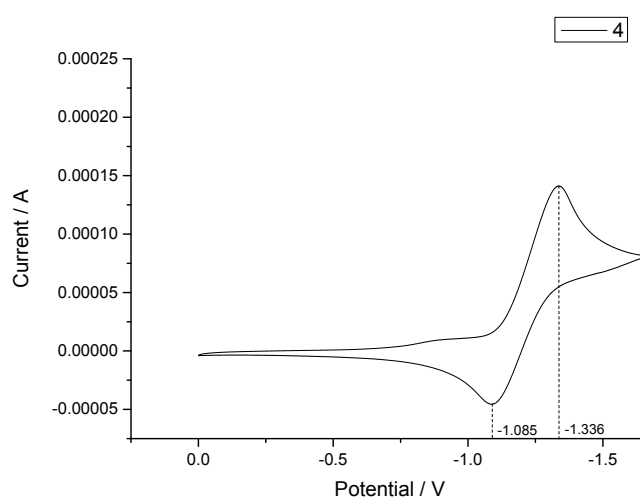

Figure S1. Cyclic voltammetry experiment of **1a**. Experiment conditions: Init E = -2 V, High = 0, Low E = -2 V, Init P/N = P, Scan Rate = 0.1 V/s, Sample Interval = 0.001 V, Quiet Time = 2 s, Sensitivity = 1e<sup>-4</sup> A/V.  $E_{1/2\text{ox}}(\mathbf{4}) = -1.211$  V

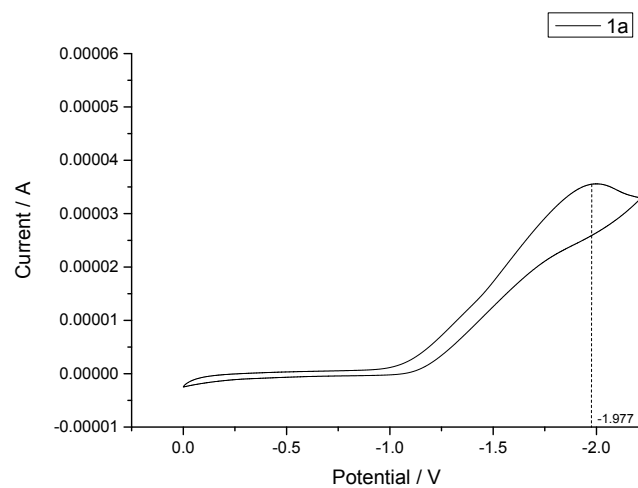

Figure S2. Cyclic voltammetry experiment of 1a. Experiment conditions: Init E = -2.5 V, High = 0, Low E = -2.5 V, Init P/N = P, Scan Rate = 0.1 V/s, Sample Interval = 0.001 V, Quiet Time = 2 s, Sensitivity =  $2e^{-4}$  A/V

## Graphical Supporting Information

### Graphical Supporting Information for the 21W white LED lamps

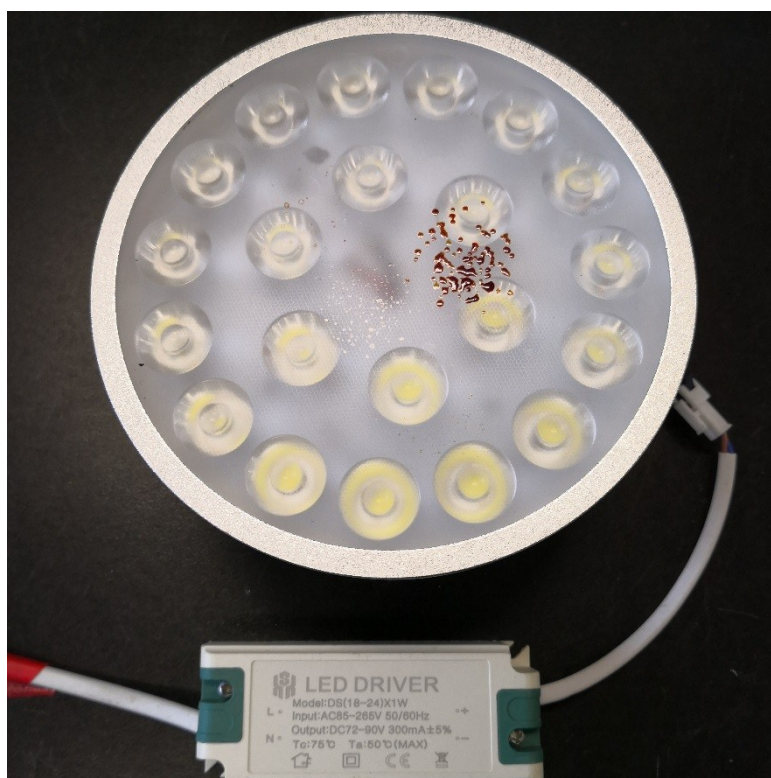

## Graphical Supporting Information for the luminous flux detector

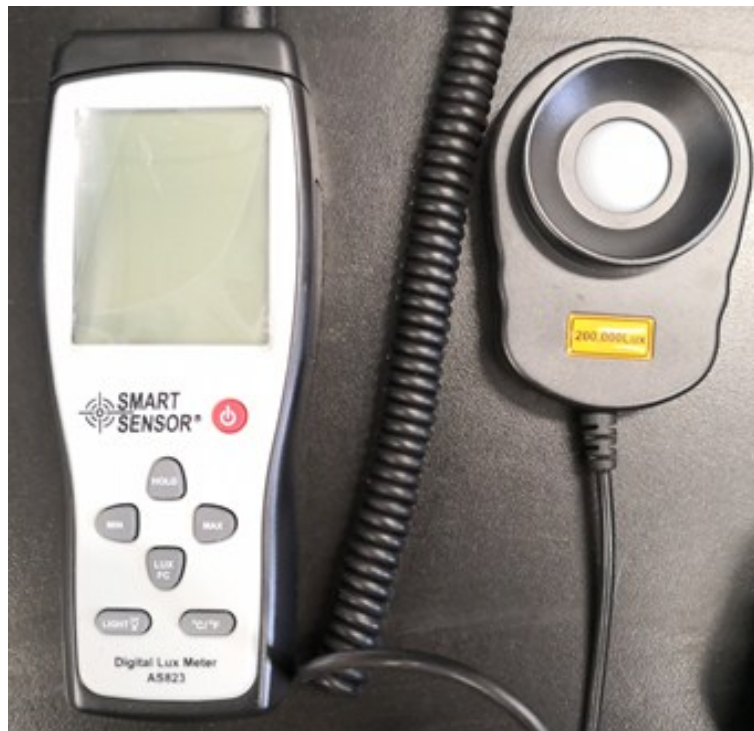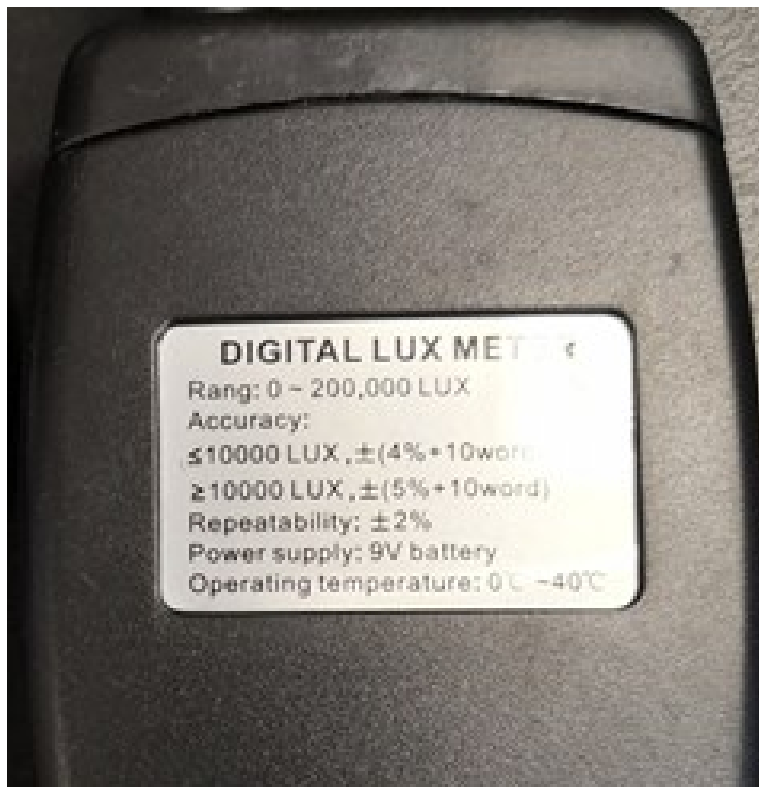

# Copies of NMR Spectra for Compounds 3a

<sup>1</sup>H NMR copy of compound 3a:

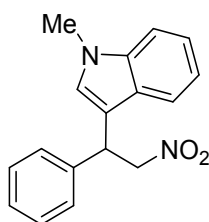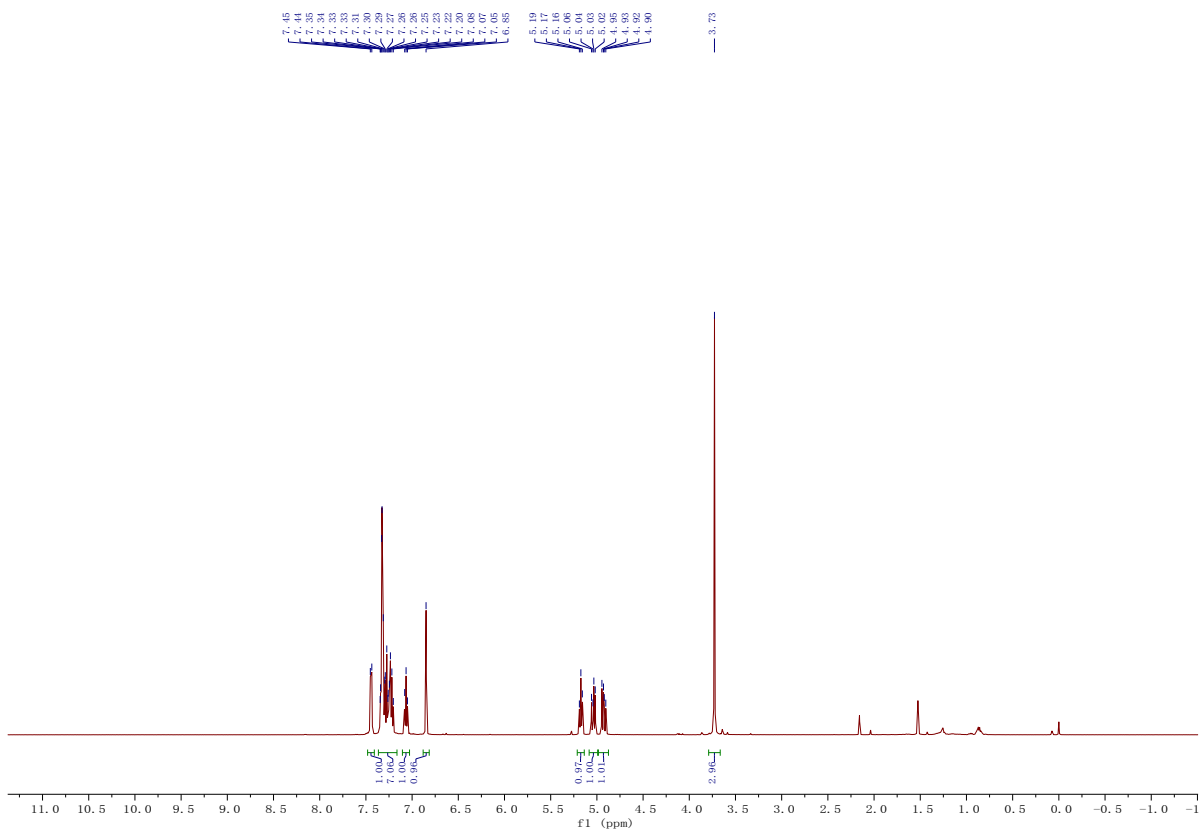

## Copies of NMR Spectra for Compounds 3b

<sup>1</sup>H NMR copy of compound 3b:

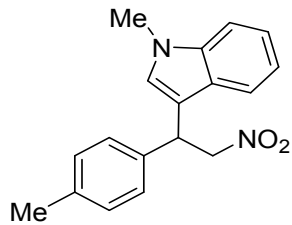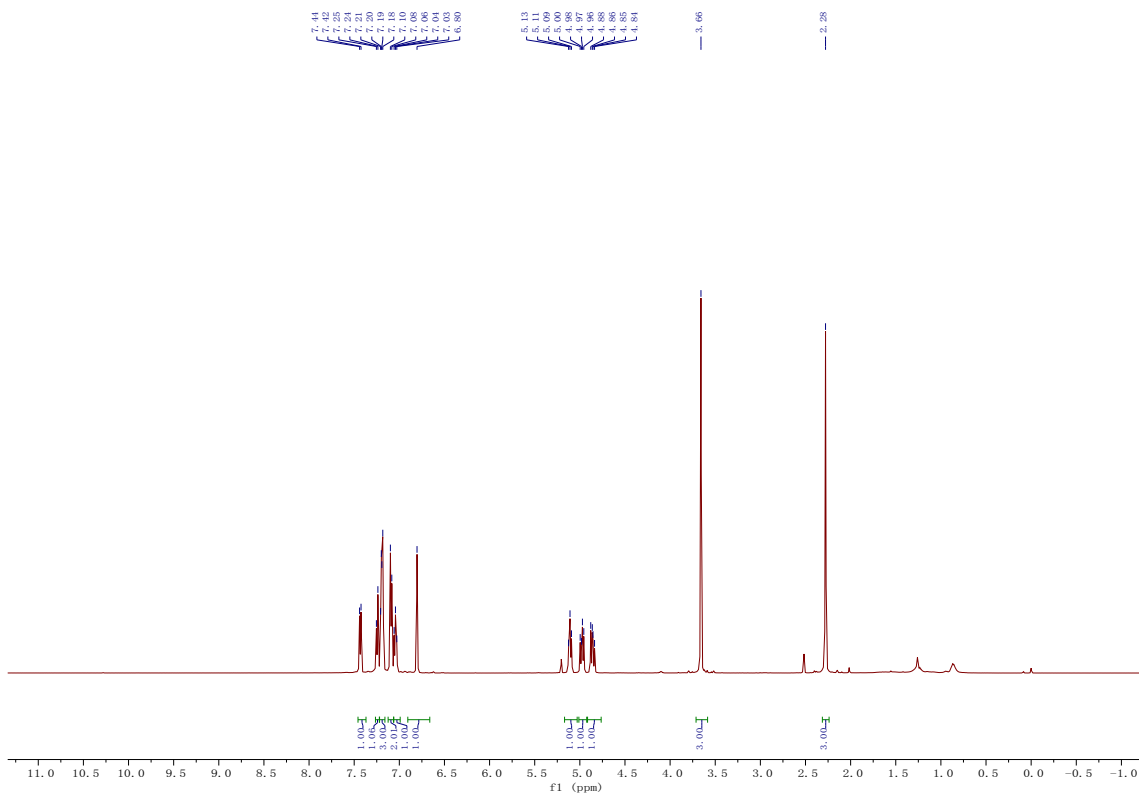







## Copies of NMR Spectra for Compounds 3e

<sup>1</sup>H NMR copy of compound 3e:

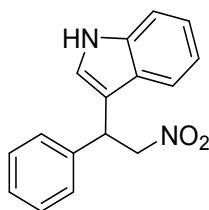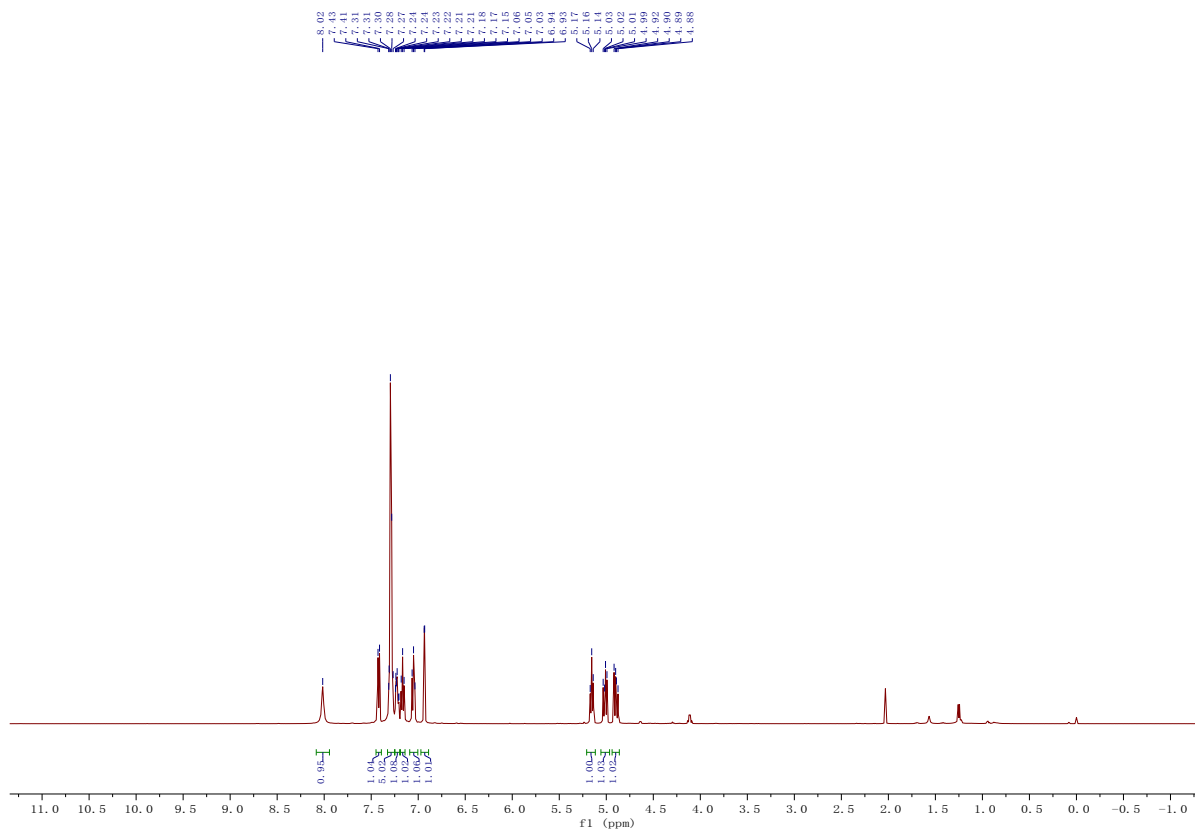





### Copies of NMR Spectra for Compounds 3h

<sup>1</sup>H NMR copy of compound 3h:

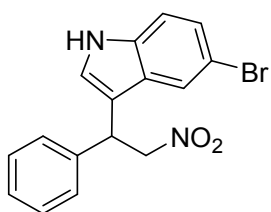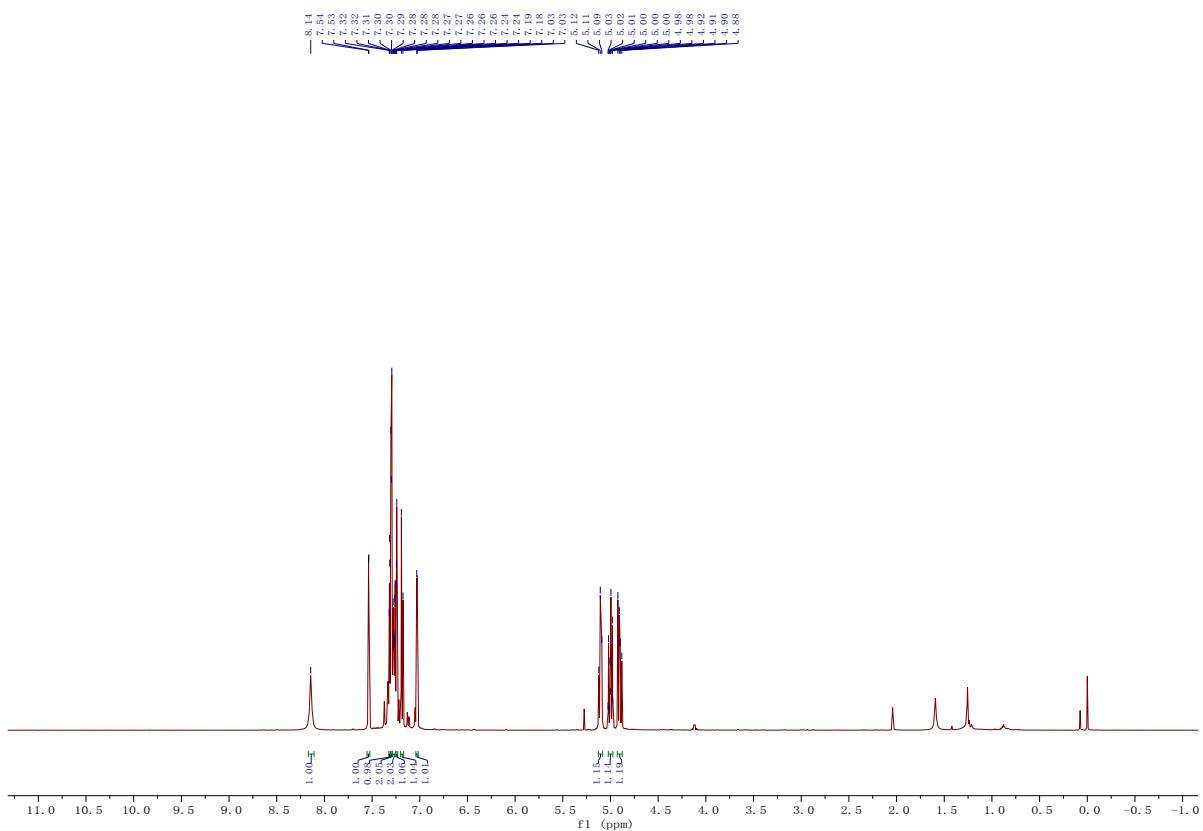

### Copies of NMR Spectra for Compounds 3i

<sup>1</sup>H NMR copy of compound 3i:

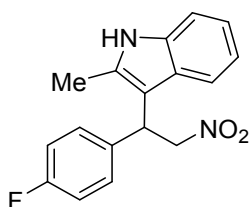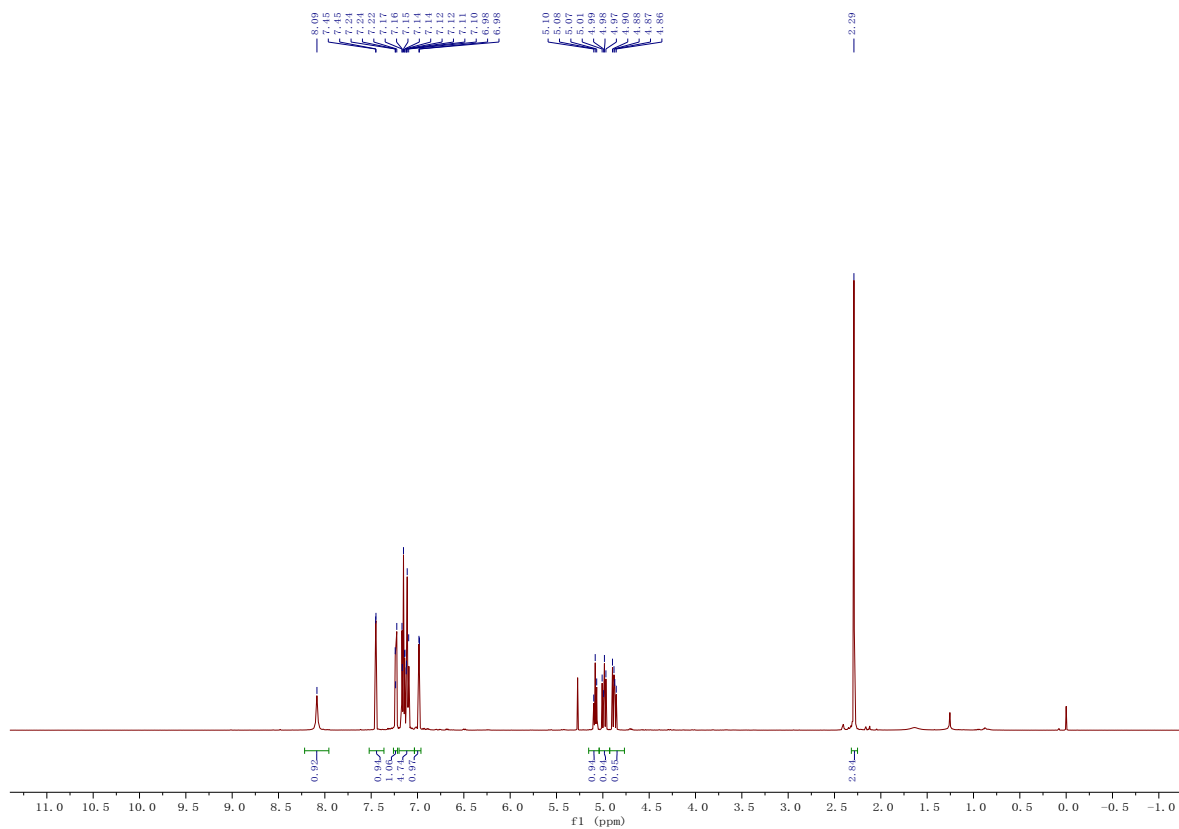

### Copies of NMR Spectra for Compounds 3j

<sup>1</sup>H NMR copy of compound 3j:

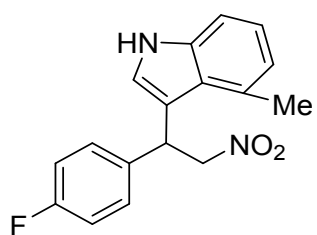

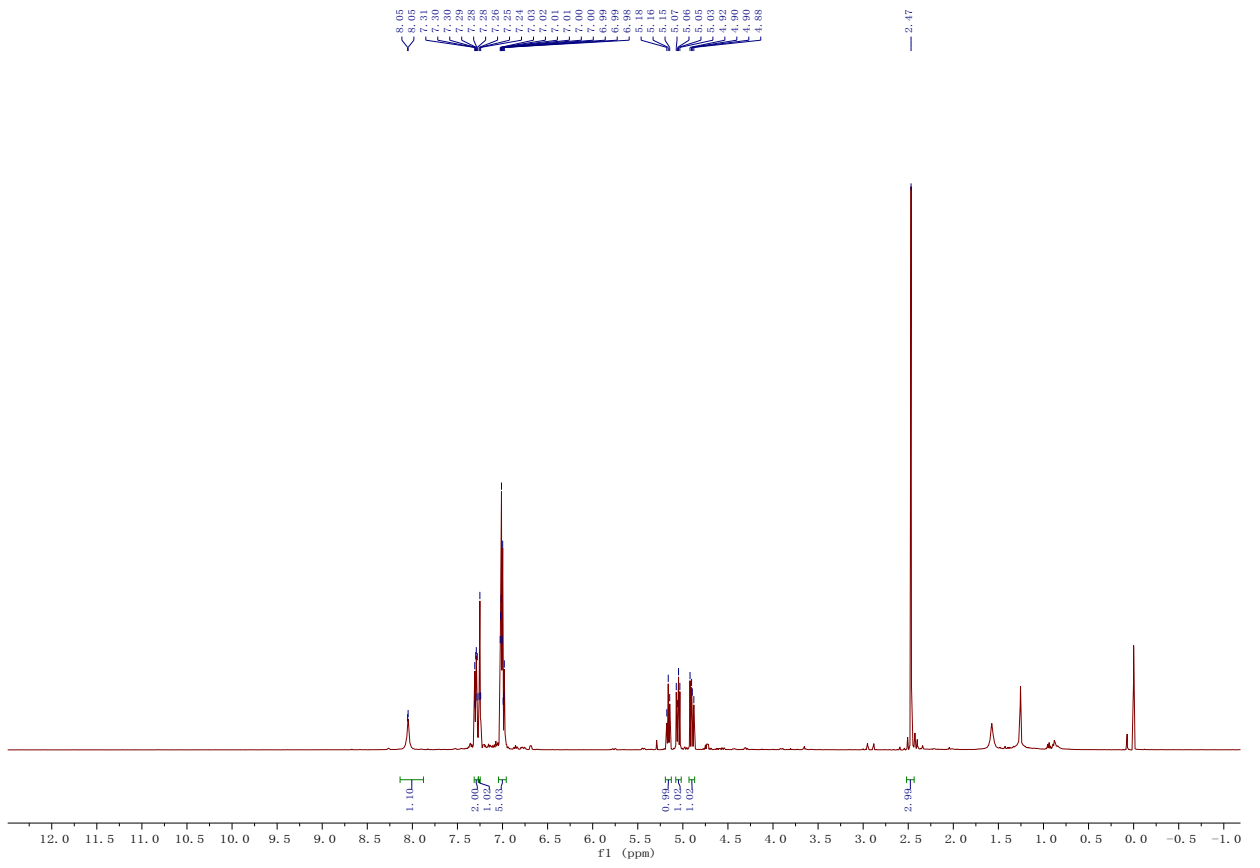



<sup>13</sup>C NMR copy of compound **3j**:

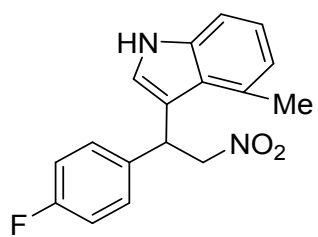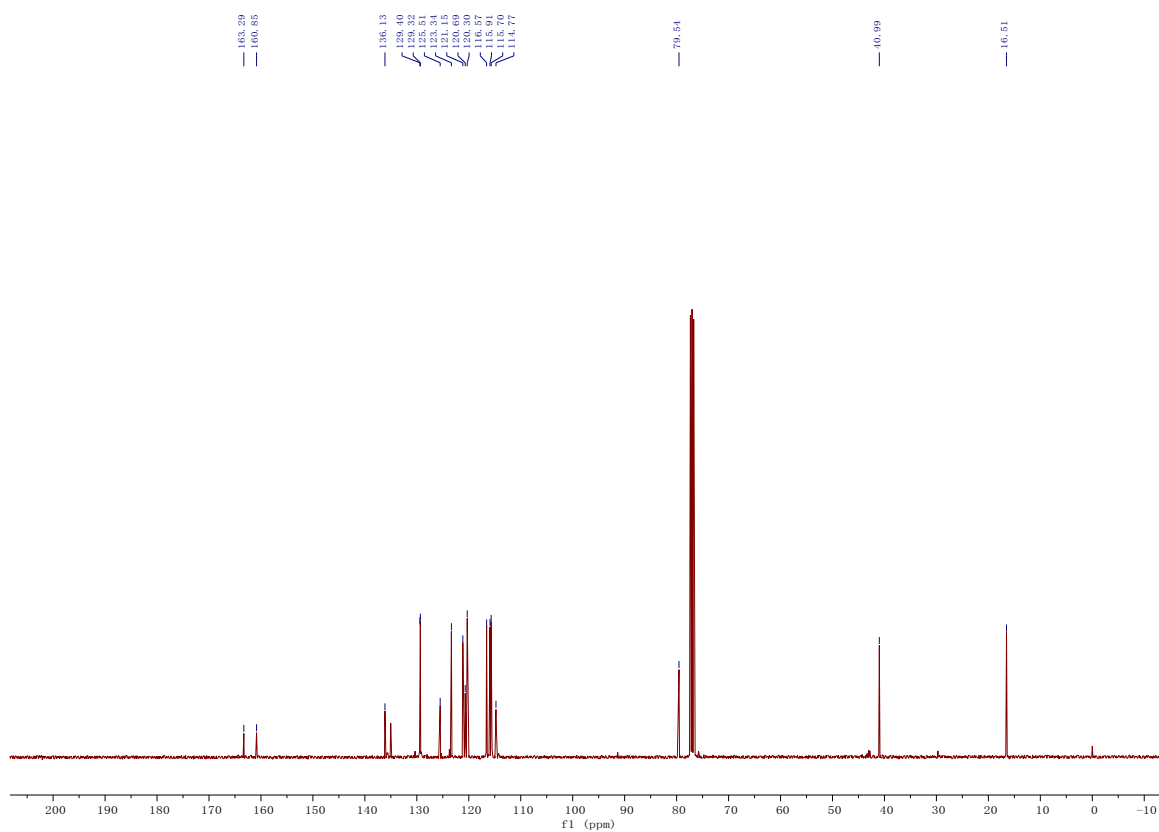

# Copies of NMR Spectra for Compounds 3k

<sup>1</sup>H NMR copy of compound 3k:

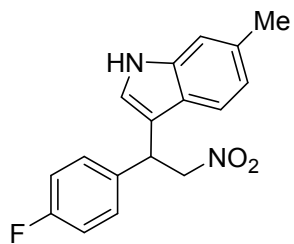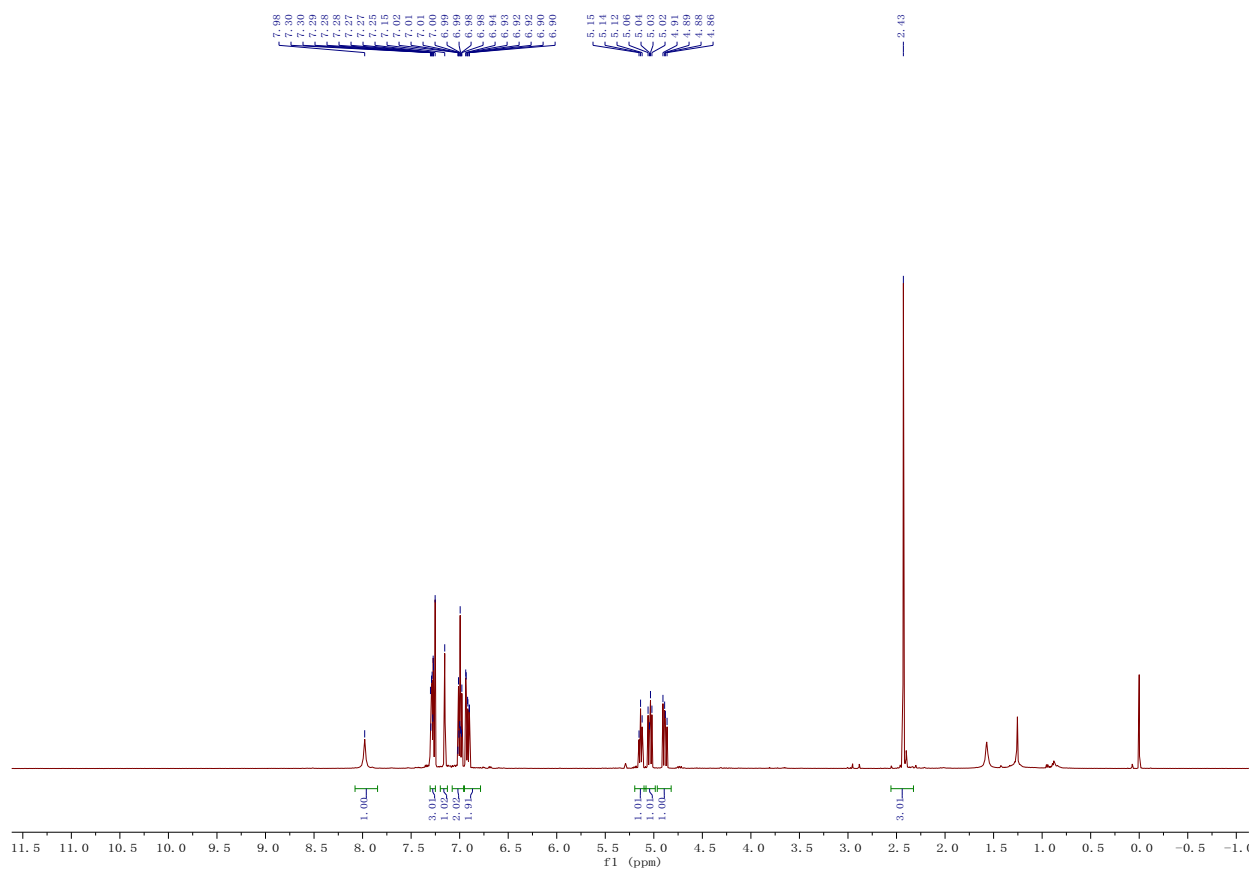

<sup>13</sup>C NMR copy of compound **3k**:

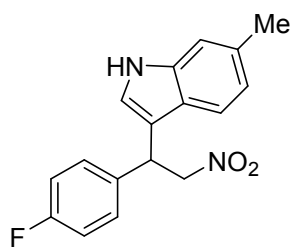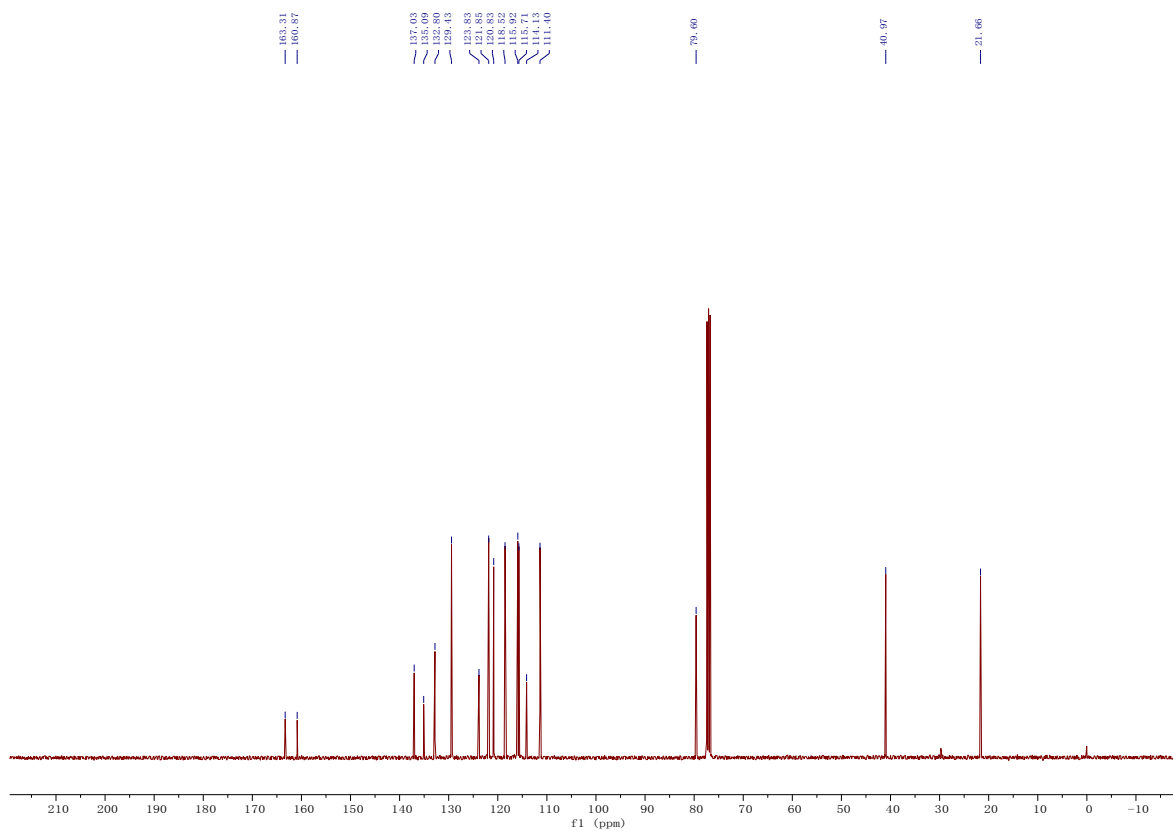

# Copies of NMR Spectra for Compounds 3I

<sup>1</sup>H NMR copy of compound 3I:

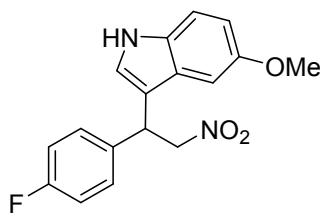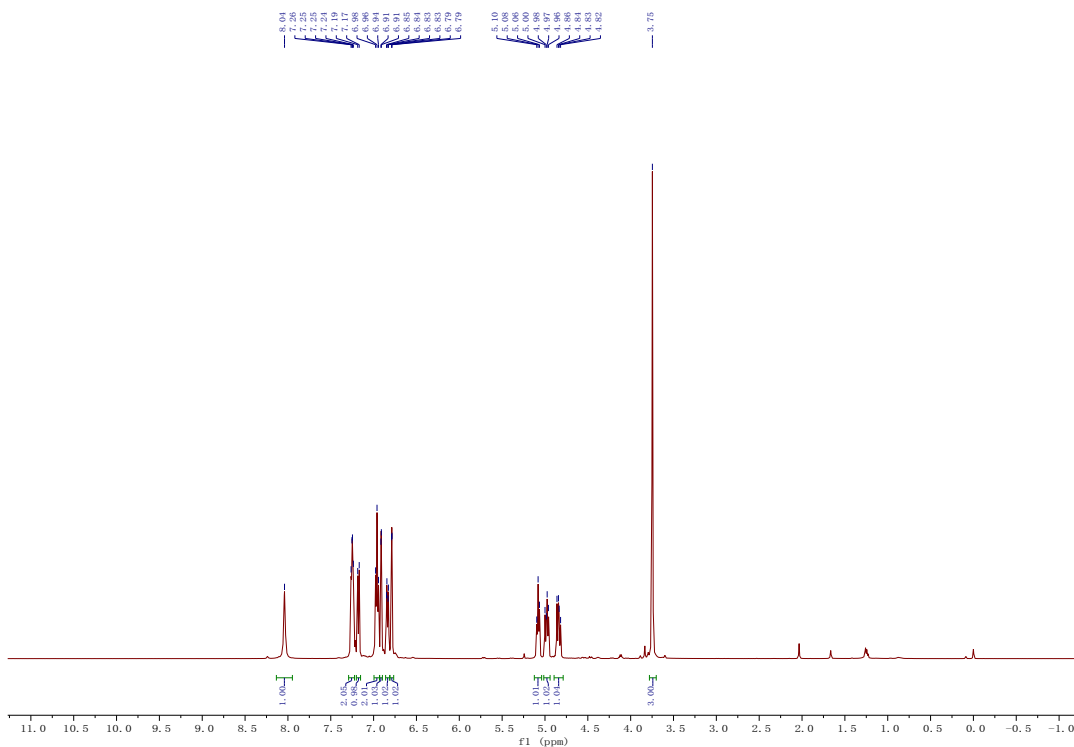



<sup>13</sup>C NMR copy of compound **3m**:

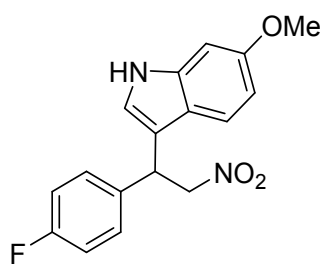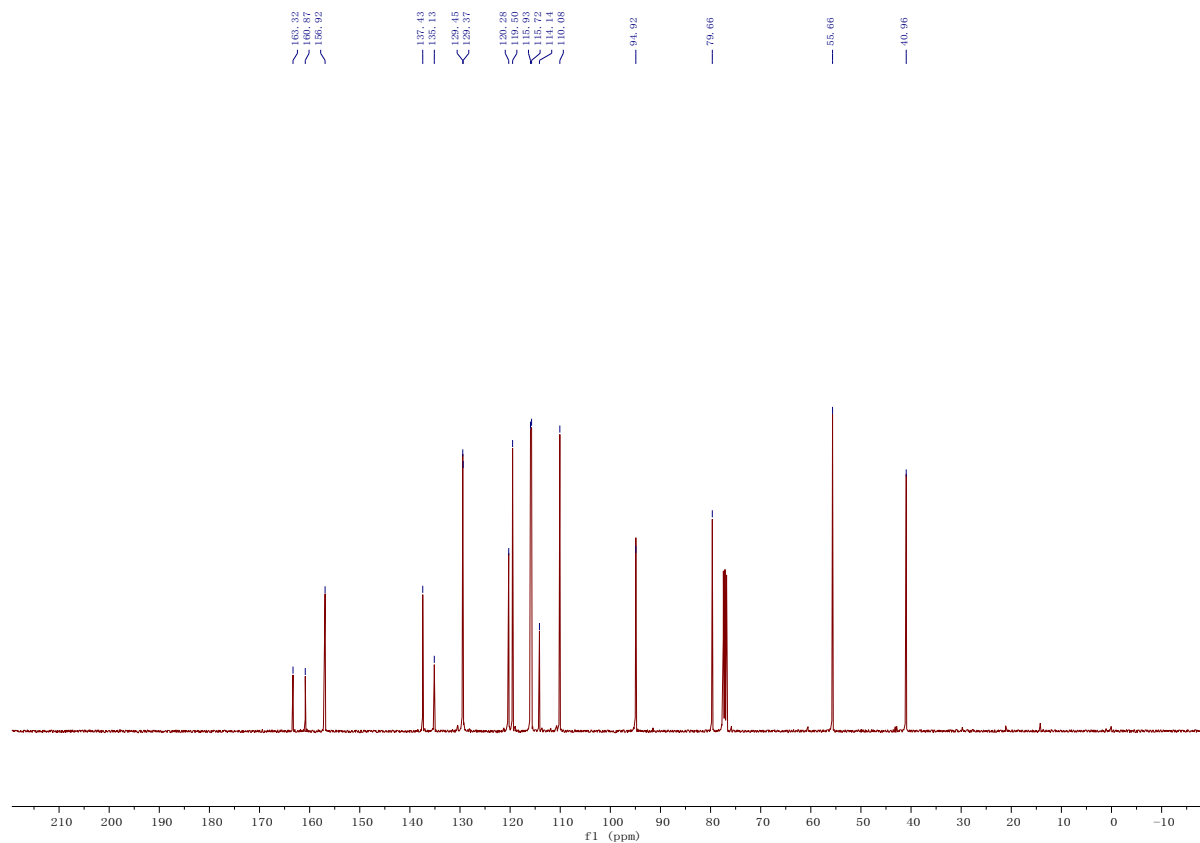

# Copies of NMR Spectra for Compounds 3n

<sup>1</sup>H NMR copy of compound 3n:

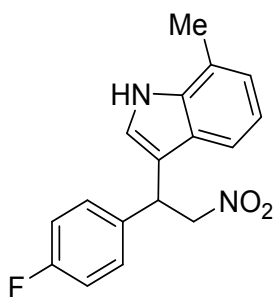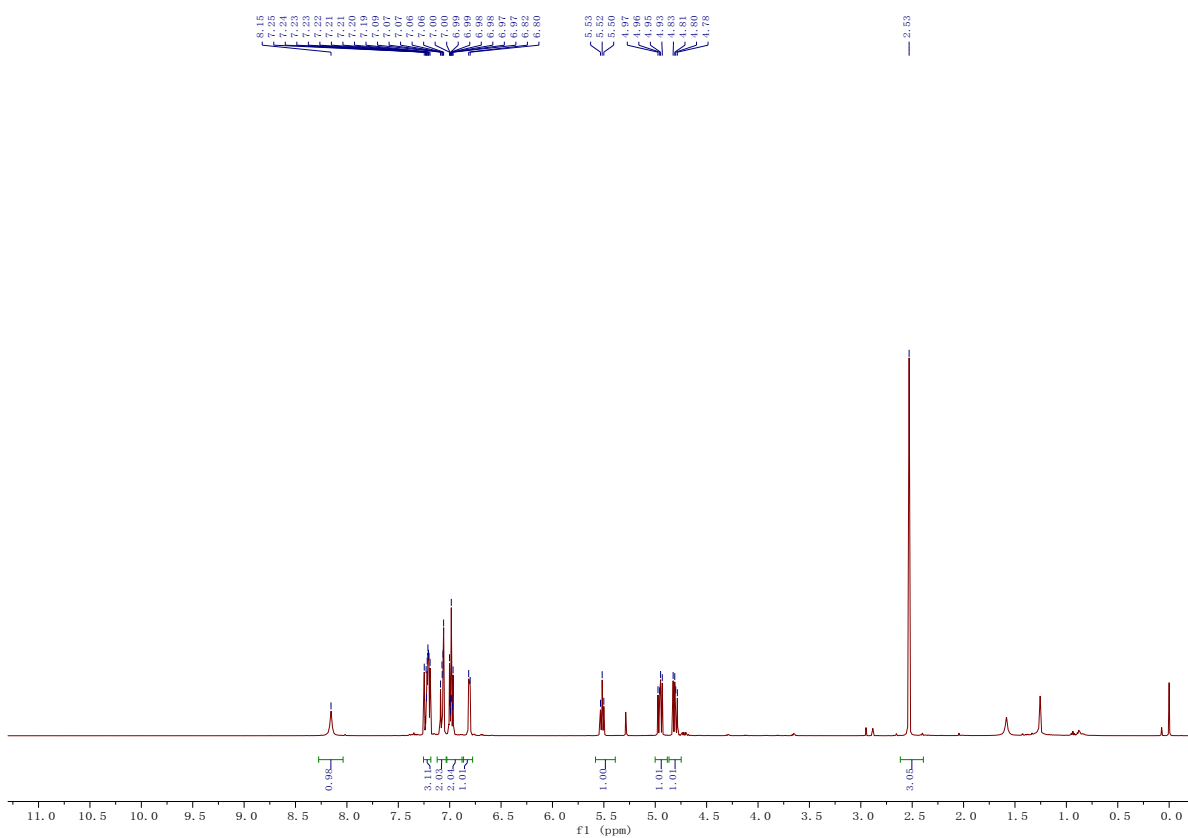

<sup>13</sup>C NMR copy of compound **3n**:

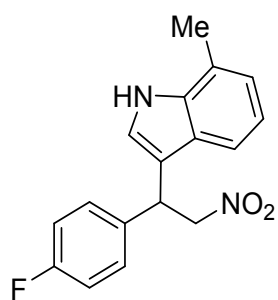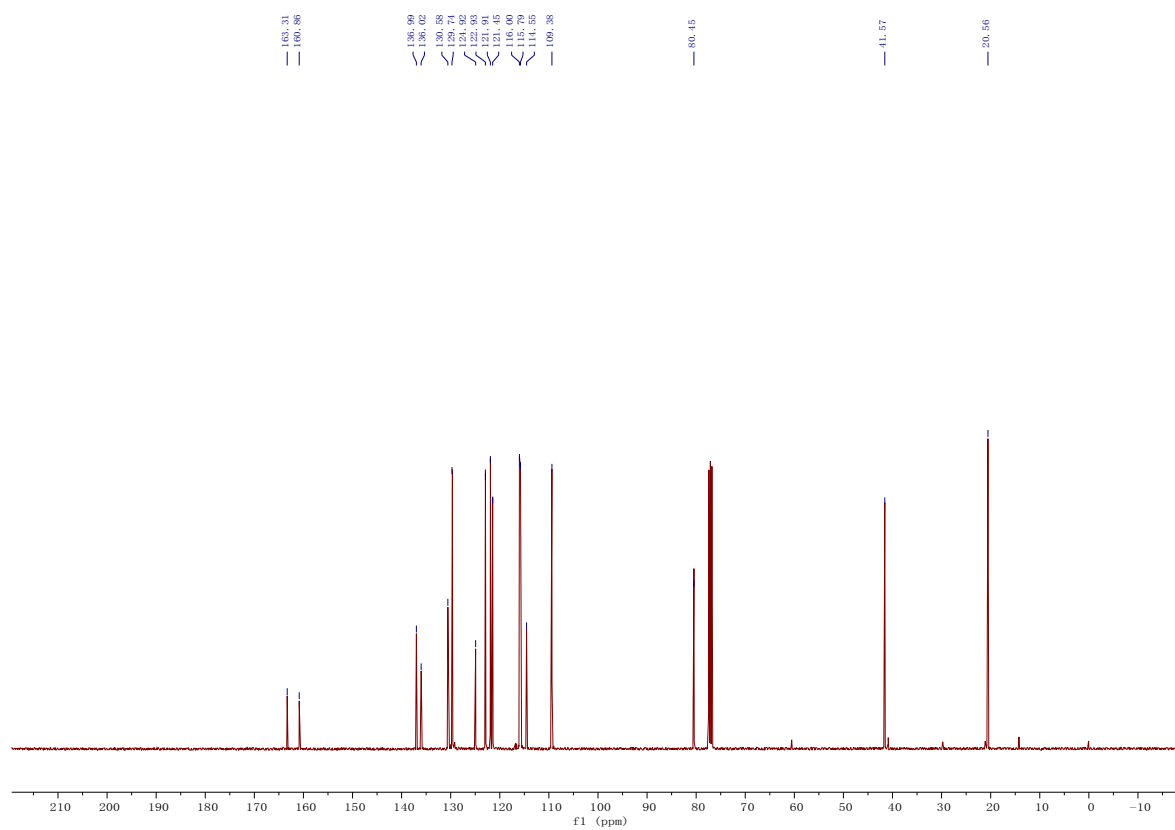



# Copies of NMR Spectra for Compounds 3o

<sup>1</sup>H NMR copy of compound 3o:

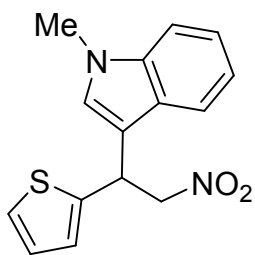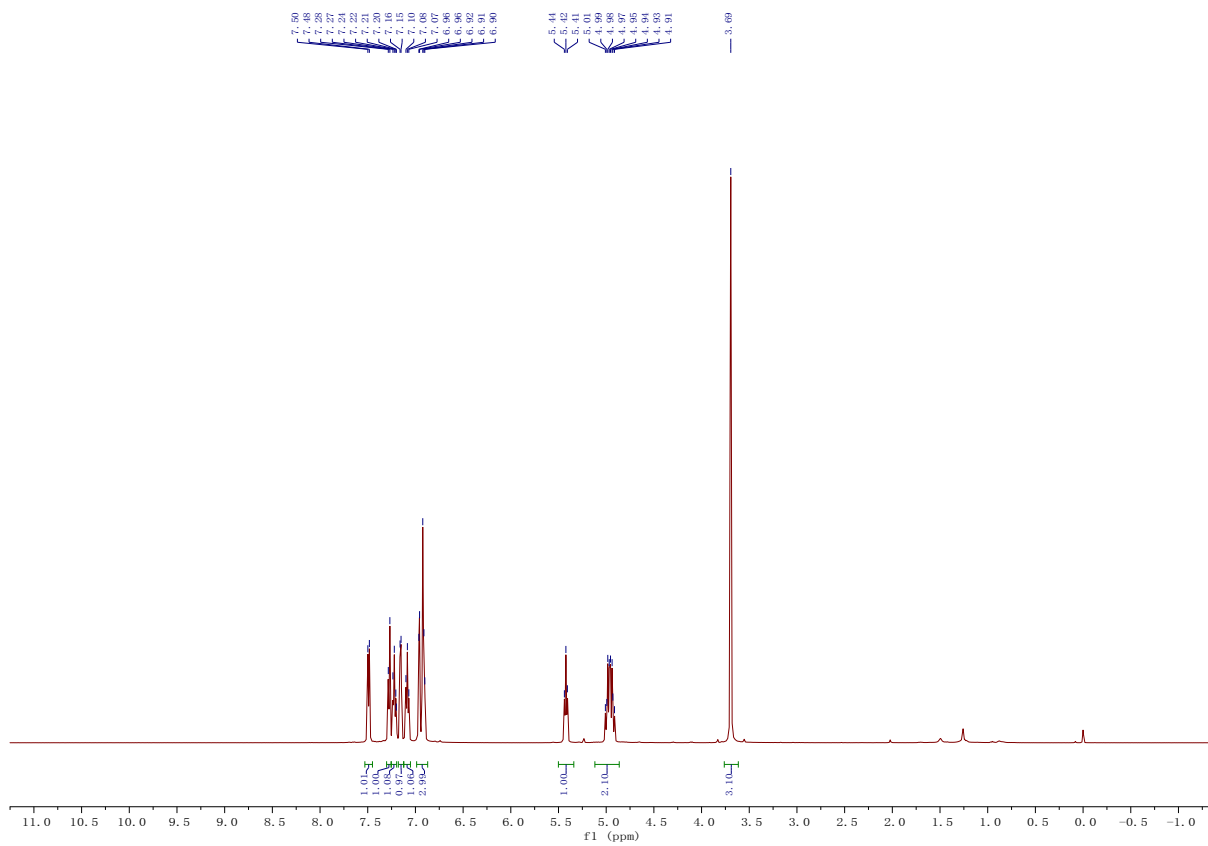

# Copies of NMR Spectra for Compounds 3p

<sup>1</sup>H NMR copy of compound 3p:

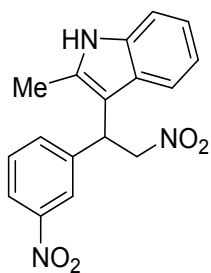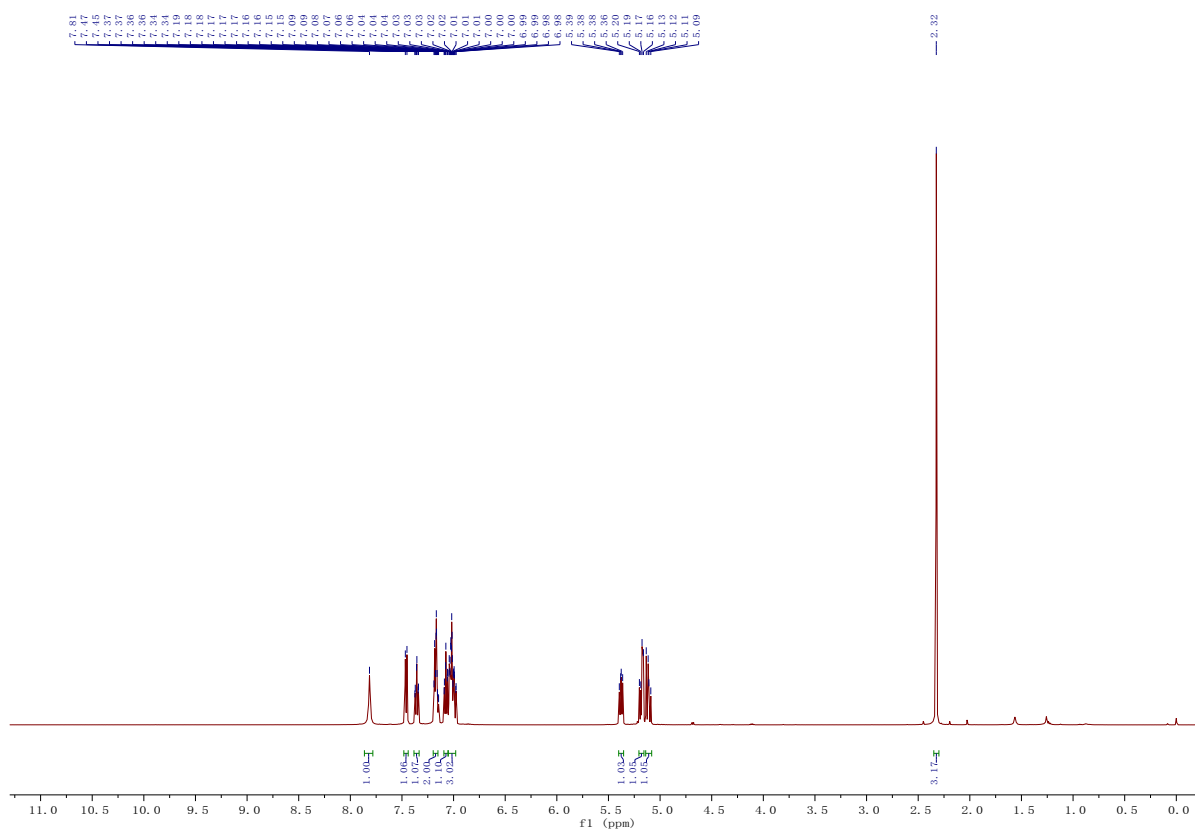

# Copies of NMR Spectra for Compounds 3q

<sup>1</sup>H NMR copy of compound 3q:

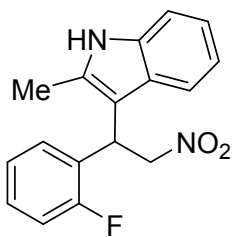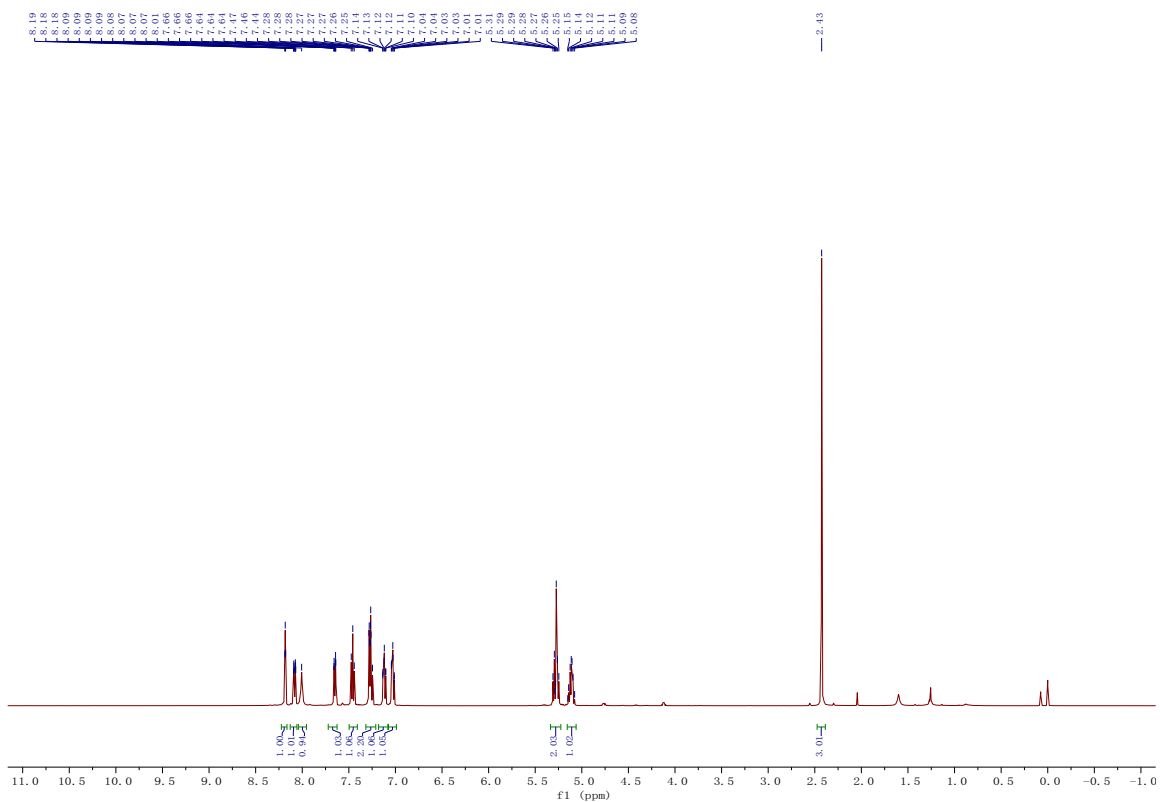

<sup>13</sup>C NMR copy of compound **3q**:

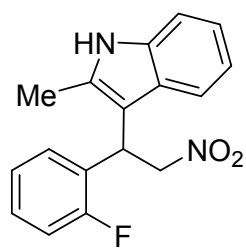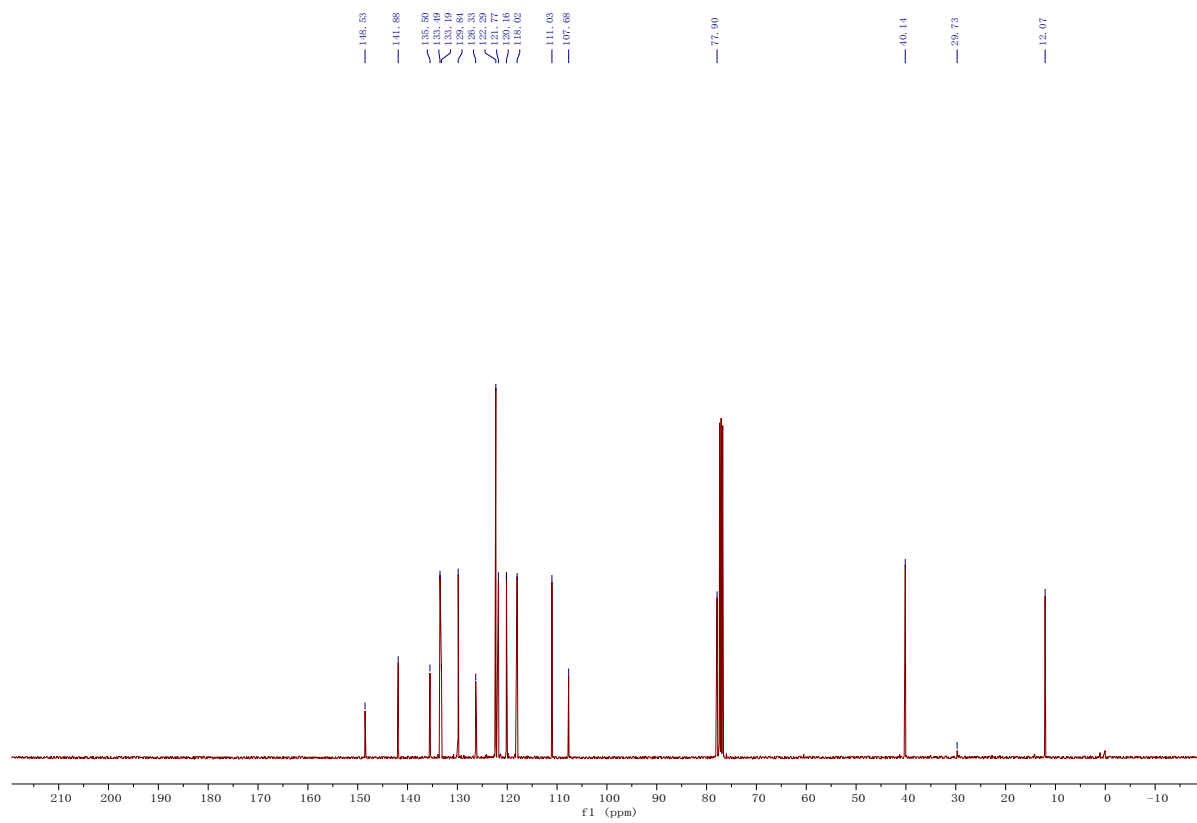

# Copies of NMR Spectra for Compounds 3r

<sup>1</sup>H NMR copy of compound 3r:

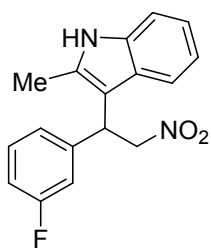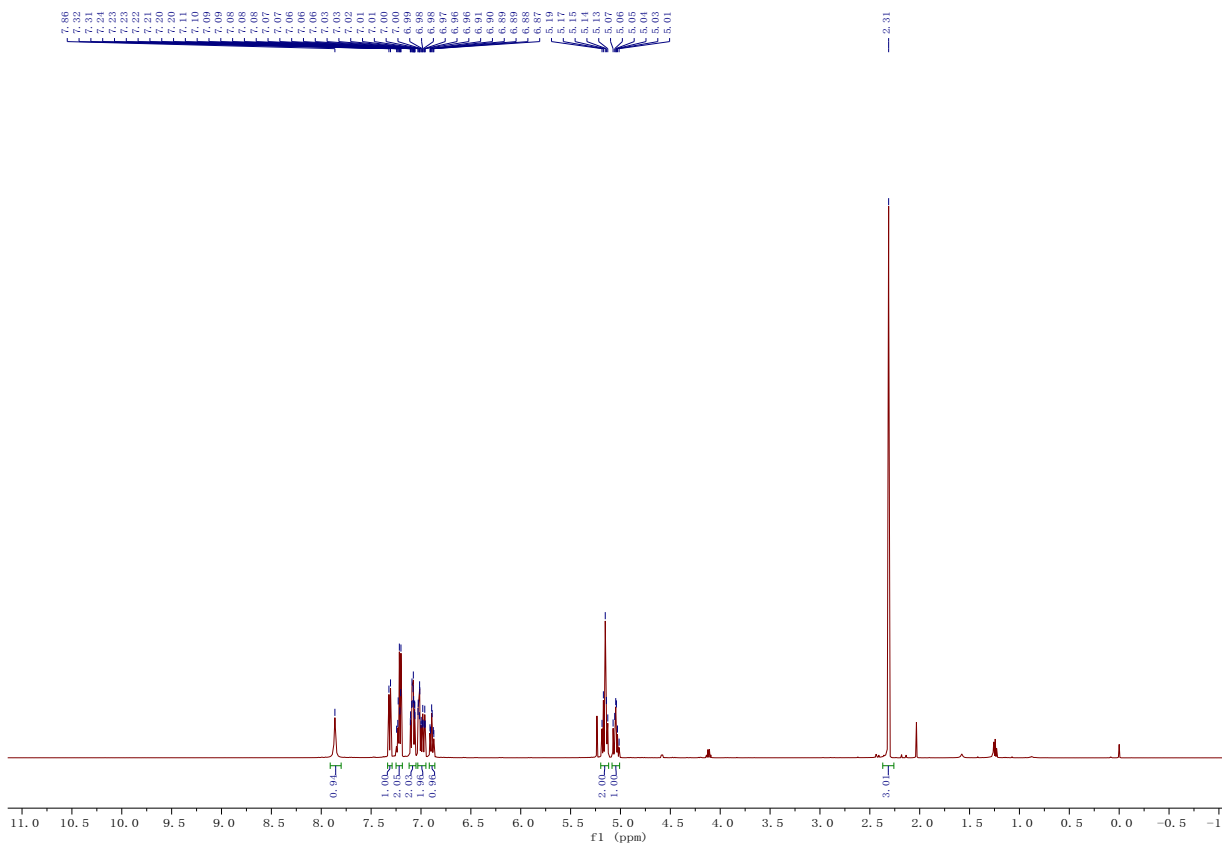

# Copies of NMR Spectra for Compounds 3s

<sup>1</sup>H NMR copy of compound 3s:

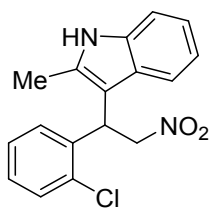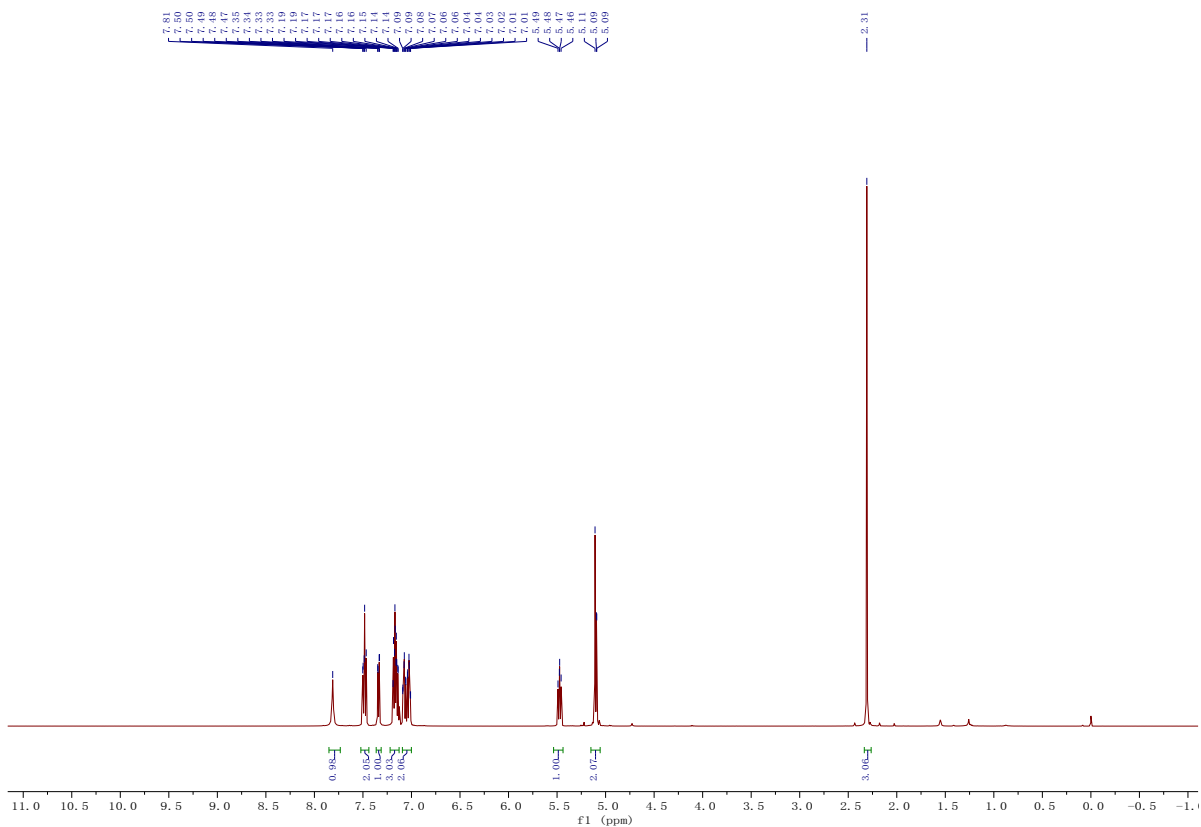



<sup>13</sup>C NMR copy of compound **3t**:

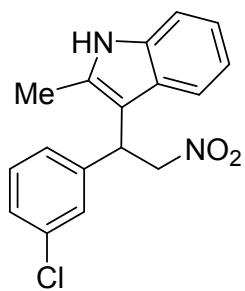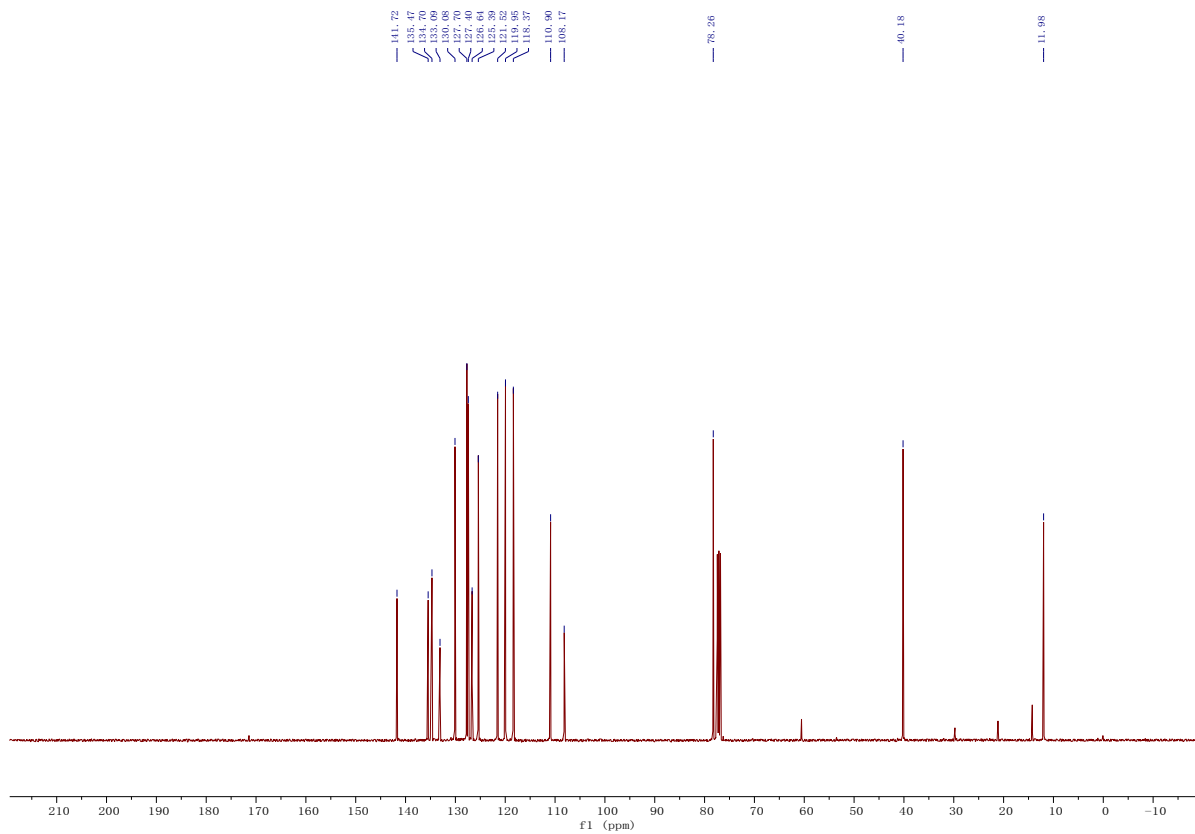



## Copies of NMR Spectra for Compounds 3u

<sup>1</sup>H NMR copy of compound 3u:

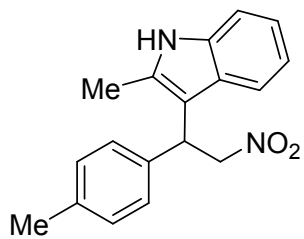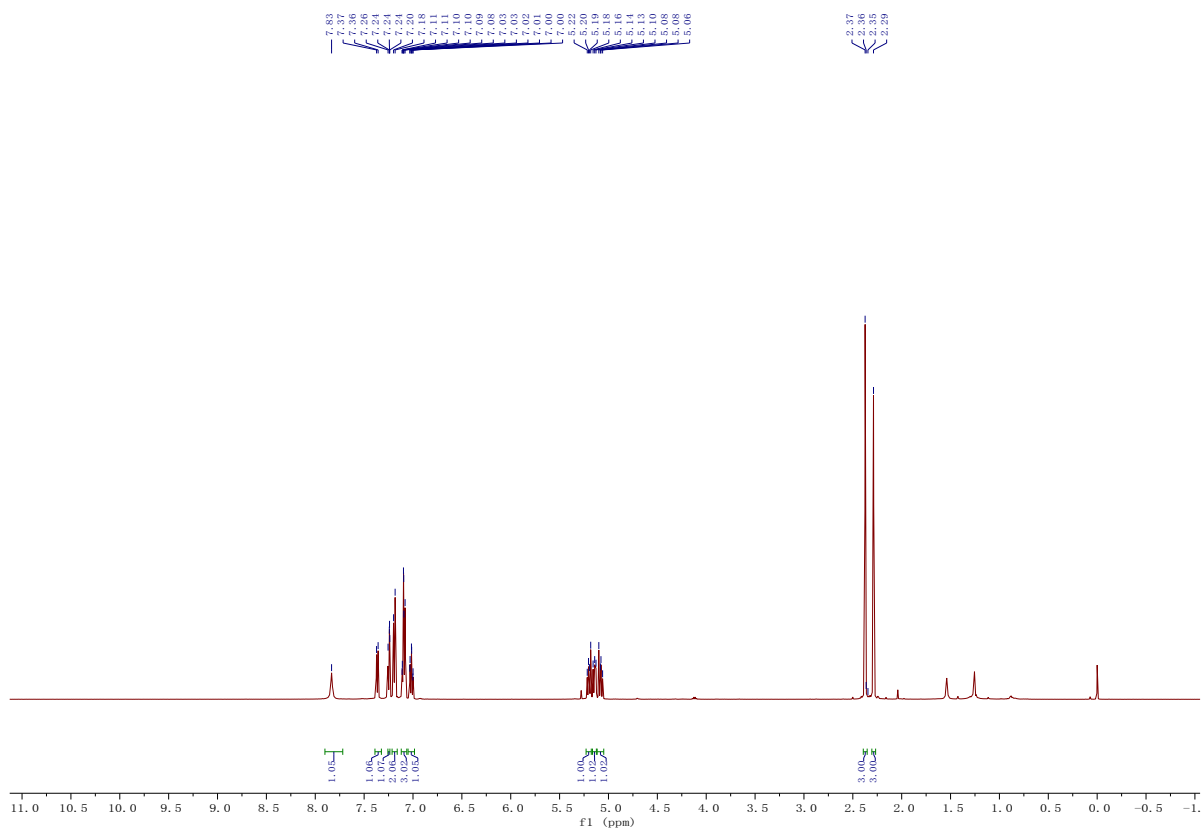

Supplement: c9ra09227g1.pdf [file c9ra09227g1.pdf]
